# Supplementary material for: Scanning the latent phases and superconductivity in the Nb–Pb system at high pressure
Source: Royal Society of Chemistry journal article supplement (doi:10.1039/d3cp01006f), 2023-01-01
Supplement: d3cp01006f5.pdf [file d3cp01006f5.pdf]

## **Electronic Supplementary Material**

### **Scanning the latent phases and superconductivity in the Nb-Pb system at high pressure**

Yanqing Qin <sup>a</sup>, Jiexi Song <sup>a</sup>, Xinyu Chen <sup>b</sup>, Diwei Shi <sup>c,\*</sup>, Rongrong Ren <sup>a</sup>, Yaocen Wang <sup>a</sup>, Xiaojun Bai <sup>a</sup>, Xiaoguang Yang <sup>d,e,\*</sup> and Chongde Cao <sup>a,\*</sup>

<sup>a</sup> School of Physical Science and Technology, Northwestern Polytechnical University, Xian 710072, China

<sup>b</sup> School of Chemistry and Chemical Engineering, Nanjing University of Science and Technology, 200 Xiao Ling Wei Street, Nanjing 210094, China

<sup>c</sup> School of Naval Architecture and Maritime, Zhejiang Ocean University, Zhoushan, Zhejiang 316022, People's Republic China

<sup>d</sup> Key Laboratory of Semiconductor Materials Science, Institute of Semiconductors, Chinese Academy of Sciences, Beijing 100083, China

<sup>e</sup> Center of Materials Science and Optoelectronics Engineering, University of Chinese Academy of Sciences, Beijing 100049, China

Author to whom correspondence should be addressed:

caocd@nwpu.edu.cn; shidiwei@zjou.edu.cn; xgyang@semi.ac.cn

**Table S1** The relative total energies of several Nb<sub>3</sub>Pb (at 0 GPa) compounds.

| Space Group                  | OQMD-ID <sup>a</sup> | relative total energies (meV/atom) |
|------------------------------|----------------------|------------------------------------|
| <b>Pmn (A15)<sup>b</sup></b> | 17740                | 7.68527                            |
| <b>P63/mmc</b>               | 318944               | 68.17163                           |
| <b>Pmm</b>                   | 343430               | 76.01067                           |
| <b>I4/mmm</b>                | 298645               | 149.0937                           |
| <b>Fmm</b>                   | 309183               | 177.5072                           |

**a: ID from The Open Quantum Materials Database (OQMD), Saal, J. E., Kirklin, S., Aykol, M., Meredig, B., and Wolverton, C. "Materials Design and Discovery with High-Throughput Density**  
**b: [https://materials.springer.com/isp/crystallographic/docs/sd\\_0251819](https://materials.springer.com/isp/crystallographic/docs/sd_0251819), Dataset ID:sd\_0251810, references 4.**

The relative total energies calculated in this work of all Nb<sub>3</sub>Pb structures listed in the Open Quantum Materials database (OQMD) together with Cmcm-Nb<sub>3</sub>Pb can be found in Table S1. The total energy of the Cmcm-Nb<sub>3</sub>Pb is set to 0 eV/atom compared to other structures. It can be found that the relative total energy of A15-Nb<sub>3</sub>Pb is about 7.6 meV/atom above that of Cmcm-Nb<sub>3</sub>Pb, which can imply that Cmcm-Nb<sub>3</sub>Pb is more stable than other possible Nb<sub>3</sub>Pb compounds at atmospheric pressure

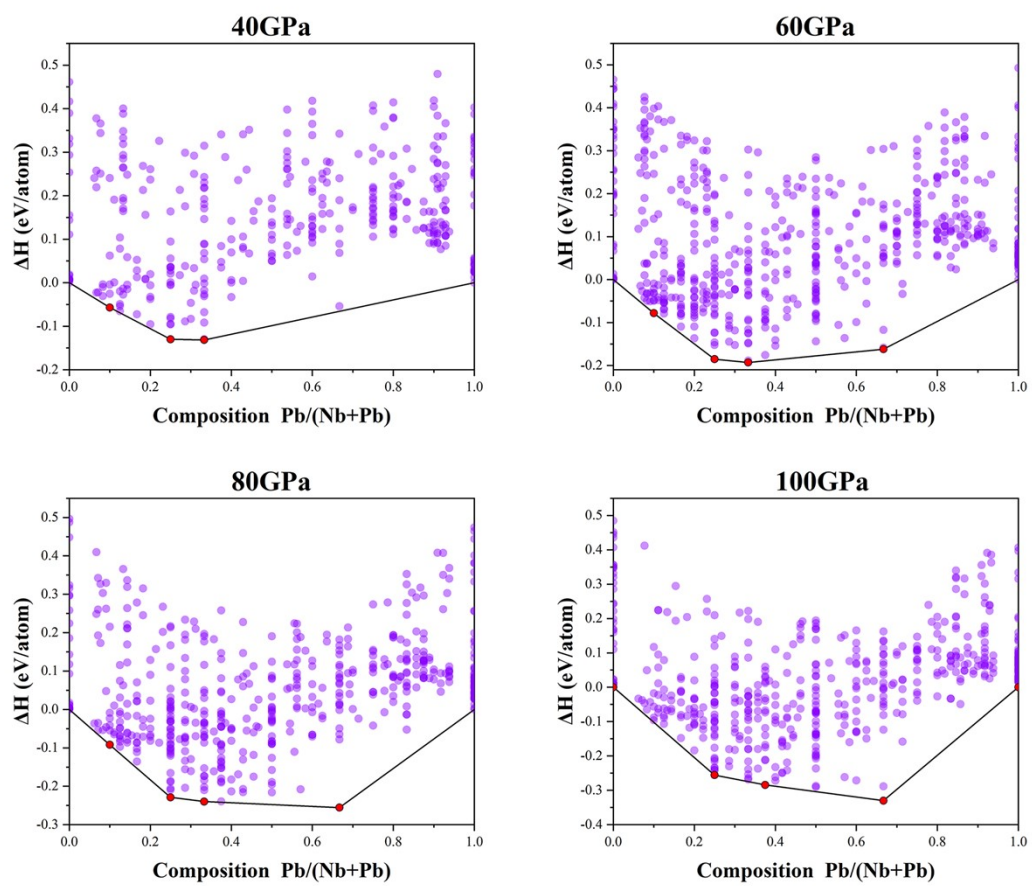

**Fig. S1** The illustration of the global structure search of the Nb-Pb system at pressures.

**Table S2** The optimized crystal parameters of the Nb-Pb intermetallics (at 0 GPa).

| Compounds                                | Lattice parameters (Å, °)                                               | Atoms   | x       | y       | z       |
|------------------------------------------|-------------------------------------------------------------------------|---------|---------|---------|---------|
| <i>I4/mmm-NbPb<sub>2</sub></i>           | a=b=c=5.02476                                                           | Nb (2b) | 1/2     | 1/2     | 0       |
|                                          | $\alpha=\beta=140.9438$                                                 | Pb (8h) | 0.17491 | 0.17491 | 0       |
|                                          | $\gamma=56.4231$                                                        | Pb (8h) | 0.82509 | 0.82509 | 1       |
| <i>Pmm2-Nb<sub>5</sub>Pb<sub>3</sub></i> | a=3.19062<br>b=4.23137<br>c=8.54208<br>$\alpha=\beta=\gamma=90.0000$    | Nb (1d) | 1/2     | 1/2     | 0.73358 |
|                                          |                                                                         | Nb (1b) | 0       | 1/2     | 0.27888 |
|                                          |                                                                         | Nb (1a) | 0       | 0       | 0.50710 |
|                                          |                                                                         | Nb (1b) | 0       | 1/2     | 0.22745 |
|                                          |                                                                         | Nb (1c) | 1/2     | 0       | 0.26940 |
|                                          |                                                                         | Pb (1c) | 1/2     | 0       | 0.75581 |
|                                          |                                                                         | Pb (1a) | 0       | 0       | 0.02315 |
|                                          |                                                                         | Pb (1d) | 1/2     | 1/2     | 0.47907 |
| <i>I4/mmm-Nb<sub>2</sub>Pb</i>           | a=b=c=5.02476                                                           | Nb (8h) | 0.17491 | 0.17491 | 0       |
|                                          | $\alpha=\beta=140.9438$                                                 | Nb (8h) | 0.82509 | 0.82509 | 1       |
|                                          | $\gamma=56.4231$                                                        | Pb (2b) | 1/2     | 1/2     | 0       |
| <i>Cmcm-Nb<sub>3</sub>Pb</i>             | a=b=5.71134<br>c=4.70318<br>$\alpha=\gamma=90.0000$<br>$\beta=114.0557$ | Nb (8g) | 0.36483 | 0.63517 | 3/4     |
|                                          |                                                                         | Nb (8g) | 0.63517 | 0.36483 | 1/4     |
|                                          |                                                                         | Nb (8g) | 0.84323 | 0.64219 | 3/4     |
|                                          |                                                                         | Nb (8g) | 0.64219 | 0.84323 | 1/4     |
|                                          |                                                                         | Nb (8g) | 0.35781 | 0.15677 | 3/4     |
|                                          |                                                                         | Nb (8g) | 0.15677 | 0.35781 | 1/4     |
|                                          |                                                                         | Pb (8g) | 0.84954 | 0.15046 | 3/4     |
|                                          |                                                                         | Pb (8g) | 0.15046 | 0.84954 | 1/4     |
| <i>P4/m-Nb<sub>9</sub>Pb</i>             | a=b=7.14754<br>c=3.29985<br>$\alpha=\beta=\gamma=90.0000$               | Nb (1a) | 0       | 0       | 0       |
|                                          |                                                                         | Nb (4k) | 0.11088 | 0.70148 | 1/2     |
|                                          |                                                                         | Nb (4j) | 0.18234 | 0.39329 | 0       |
|                                          |                                                                         | Nb (4k) | 0.29852 | 0.11088 | 1/2     |
|                                          |                                                                         | Nb (4j) | 0.39329 | 0.81766 | 0       |
|                                          |                                                                         | Nb (4j) | 0.60671 | 0.18234 | 0       |
|                                          |                                                                         | Nb (4k) | 0.70148 | 0.88912 | 1/2     |
|                                          |                                                                         | Nb (4j) | 0.81766 | 0.60671 | 0       |
|                                          |                                                                         | Nb (4k) | 0.88912 | 0.29852 | 1/2     |
|                                          |                                                                         | Pb (1d) | 1/2     | 1/2     | 1/2     |

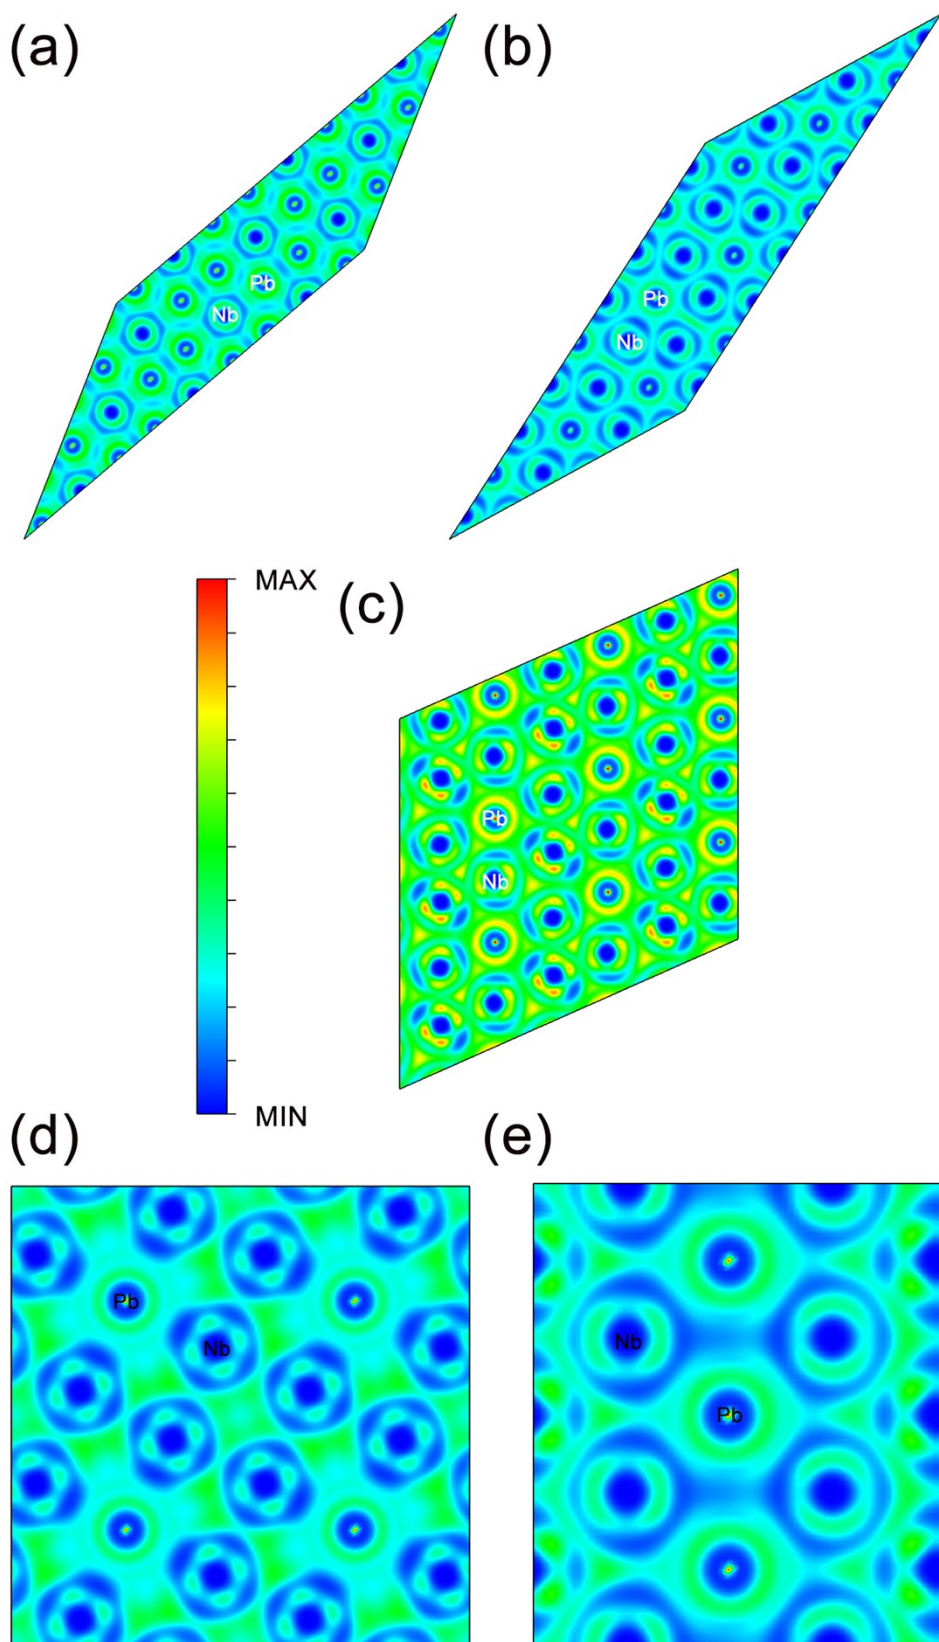

Fig. S2 The Electron Localization Function (ELF) of NbPb<sub>2</sub> (a), Nb<sub>2</sub>Pb (b), Nb<sub>3</sub>Pb (c), Nb<sub>9</sub>Pb (d) and Nb<sub>5</sub>Pb<sub>3</sub> (e).

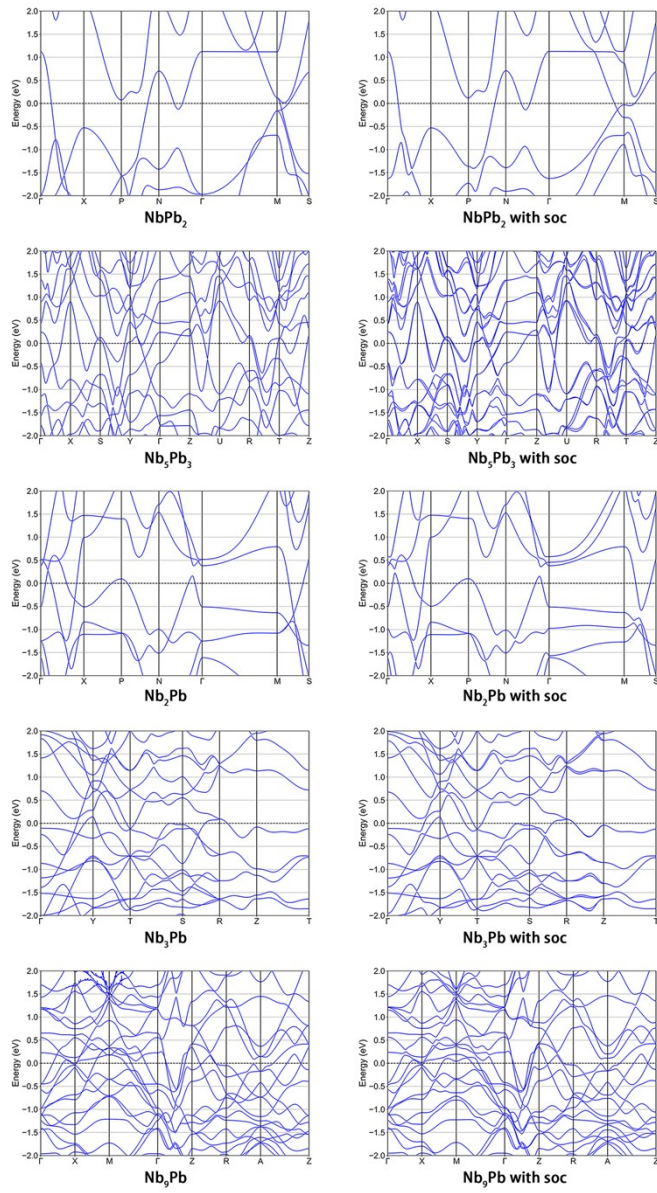

**Fig. S3** The energy band structures of Nb-Pb intermetallics with soc and without soc.
