# Supplementary figures and images for: Scanning the latent phases and superconductivity in the Nb–Pb system at high pressure
Source: Royal Society of Chemistry journal article supplement (doi:10.1039/d3cp01006f), 2023-01-01

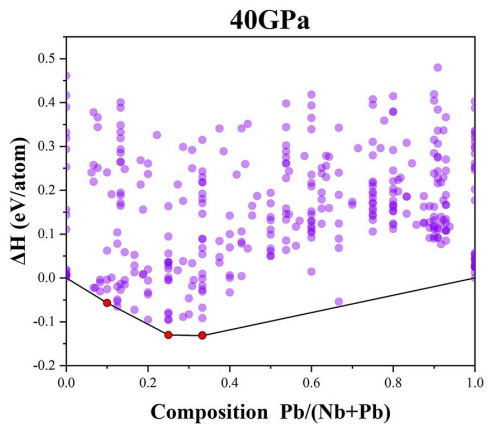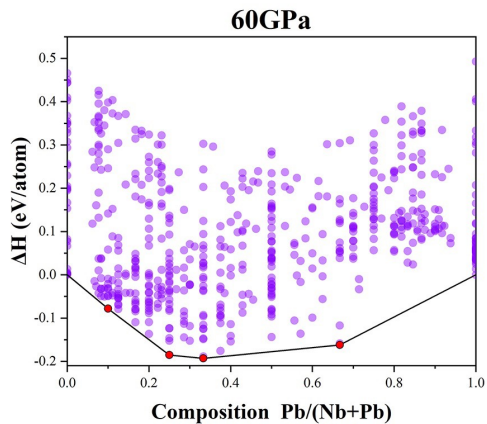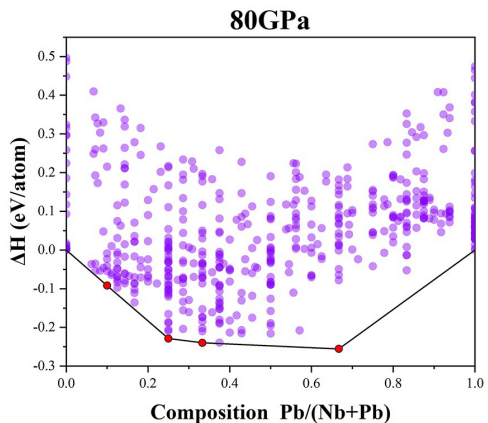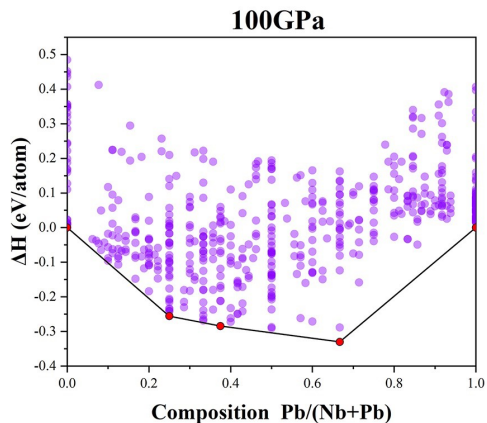

Supplement: d3cp01006f2.pdf [file d3cp01006f2.pdf]

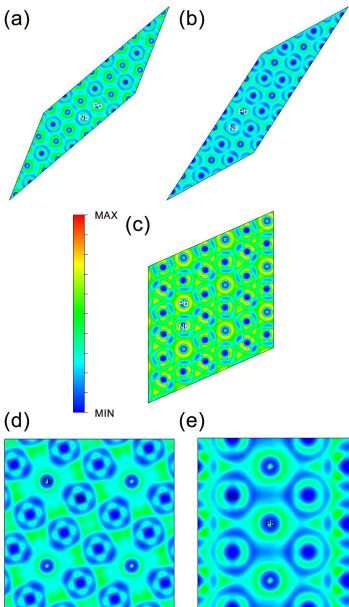

Supplement: d3cp01006f3.pdf [file d3cp01006f3.pdf]

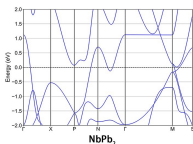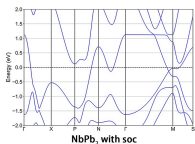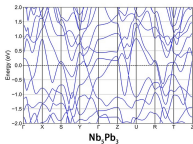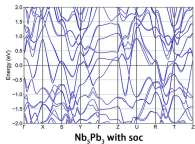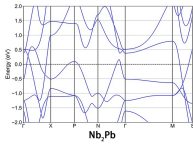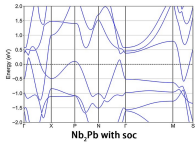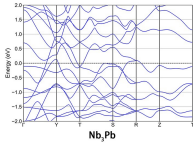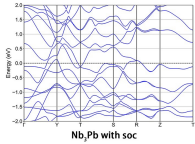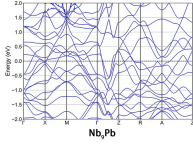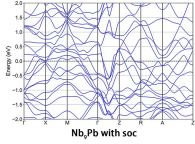

Supplement: d3cp01006f4.pdf [file d3cp01006f4.pdf]
